# Supplementary material for: The Sunflower WRINKLED1 Transcription Factor Regulates Fatty Acid Biosynthesis Genes through an AW Box Binding Sequence with a Particular Base Bias
Source: MDPI journal article supplement (doi:10.3390/plants11070972), 2022-04-02

**Figure S1.** SDS-PAGE followed by Coomassie staining to show the purified recombinant proteins used in EMSA. *HaWRI1*\_DBD, sunflower 6-His-Thioredoxin-WRINKLED1\_DNA Binding Domain (312 aa, 35 kDa); TRX, 6-His-Thioredoxin fusion protein (163 aa, 18 kDa); GFP, 6-His-Thioredoxin-Green Fluorescent Protein (773 aa, 41 kDa). MW, Molecular Weight; T, total fraction; SB, soluble fraction; P, purified protein.

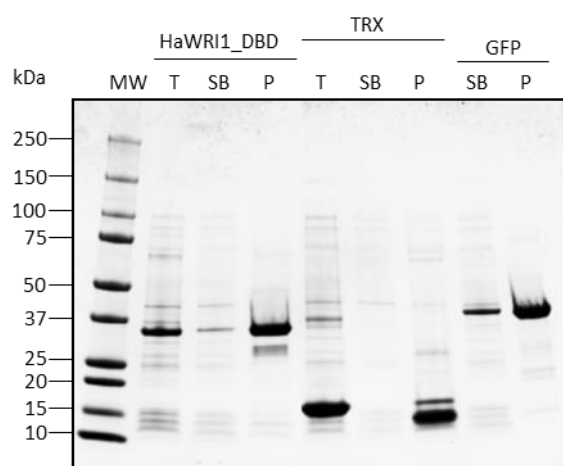

Supplement: s1 [file s1]
